# Supplementary material
Source: ML conference proceedings conference paper supplement (https://openreview.net/forum?id=3IdxENWcVH)
Supplement: supplementary_material [file attachment]

# Fake it to make it: Using synthetic data to remedy the data shortage in joint multimodal speech-and-gesture synthesis

## Supplementary Material

### 1212 A. GPT-4 prompts

1213 After supplying 50 example utterance transcriptions from  
1214 TSGD2, the generation of synthetic phrases was initialised  
1215 using the following text prompt:

1216 Take these sentences into account and learn their  
1217 conversational style ignore the content learn the  
1218 hesitations and disfluencies (using three dots for  
1219 long pauses ...) and uh, um and uhm for conversa-  
1220 tional disfluencies. Generate more sentences like  
1221 this in form of spontaneous conversational mono-  
1222 logues. Remember disfluencies should be either  
1223 repeating, ..., uh, um or uhm. Make it sound nat-  
1224 ural as human would converse. Create 50 phrases  
1225 which mimics how people speak including filled  
1226 pauses. Make phrases that are highly emotional  
1227 but realistic.

1228 After that, the model was prompted to generate further  
1229 phrases corresponding to a variety scenarios and emotions,  
1230 to obtain more variety. Here are some examples:

- 1231 • Continue generation for a happy emotion imagine a dif-  
1232 ferent scenario of getting your research paper accepted  
1233 after a difficult and long review process.
- 1234 • continue generation about confusion emotion talk about  
1235 getting lost on the way to a new city
- 1236 • Continue the generation for happy tone and talk about  
1237 your favourite movie that you recently watched at the the-  
1238 atre and recommend it to people
- 1239 • Make these sentences a bit smaller just reduce 5–10 words  
1240 max per sentence. Keep the conversational style and dis-  
1241 fluencies it is very important to keep those. keep uh, um  
1242 and pauses, repeats, fixes and other disfluencies. con-  
1243 tinue happy generation talk about a perfect date at your  
1244 favourite restaurant
- 1245 • generate more, but start the sentence in a different way.  
1246 generate some sentences with negation like saying no to  
1247 things, denying something etc. focus on new topics, you  
1248 can forget the old topic. talk about people compelling  
1249 you to learn to play different sports, musical instruments,  
1250 dance forms and you denying to it.
- 1251 • continue generation, talk about how excited you are to get  
1252 a new dream job
